# Supplementary material
Source: PubMed Central journal article supplement (PMC2585499)

Hwang et al., Supplement Fig. 1

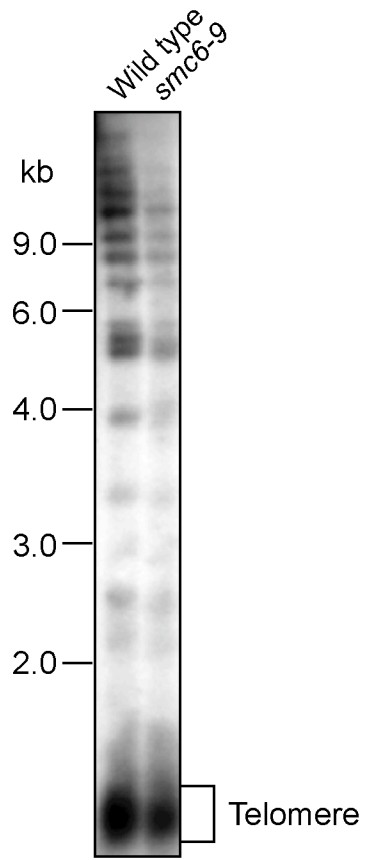

Supplement: NIHMS66368-supplement-01.pdf [file NIHMS66368-supplement-01.pdf]
